# See and Hear What the Field Is Discussing!

*Psychiatric Services* features research related to the delivery of mental health services, especially for people with serious mental illness in community-based treatment programs. Provision of high-quality care involves collaboration among a variety of professionals. Clinicians, administrators, and policy makers look to *Psychiatric Services* for research on how to deliver evidence-based treatments, to take an integrated “whole-health” approach to care, and to better engage individuals in their care. Mental health’s current focus on patient-centered, recovery-oriented care and on dissemination of evidence-based practices is transforming service delivery systems at all levels. Research published in *Psychiatric Services* contributes to this transformation.

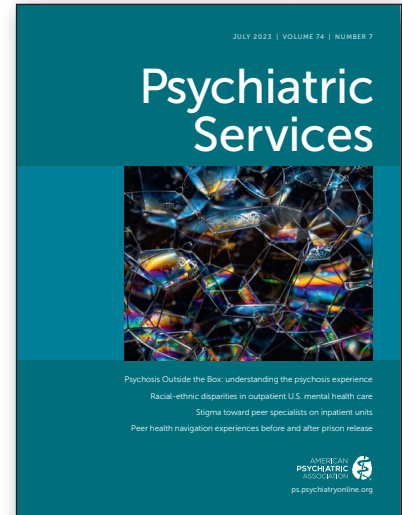

## Our Most Talked About Articles in 2023:

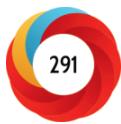

### Established Outpatient Care and Follow-Up After Acute Psychiatric Service Use Among Youths and Young Adults

January issue

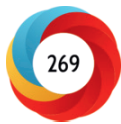

### Mental Health Emergency Hotlines in the United States: A Scoping Review (2012–2021)

May issue

## The Discussion Continues: *Psychiatric Services*' Podcast “From Pages to Practice”

Editor Lisa Dixon, M.D., M.P.H., and Podcast Editor and co-host Josh Berezin, M.D., M.S., discuss the latest mental health services research published in *Psychiatric Services* and why it is relevant. Topics include community-based treatment programs, collaborative care, evidence-based treatment and service delivery, criminal and social justice, policy analysis, and more.

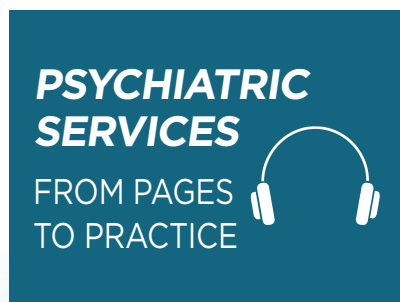

### Guidance for Handling the Increasing Prevalence of Drugs Adulterated or Laced With Fentanyl

Joseph Parks, M.D., discusses guidelines for clinicians in how to deal with the increased prevalence of drugs adulterated with fentanyl and similar potent fentanyl analogs.

### Psychiatrist and Nonpsychiatrist Physician Network Breadth in Dual Eligible Special Needs Plans

Eric P. Slade, Ph.D., discusses the complex and often confusing world of dual eligibility for Medicare and Medicaid coverage when it comes to mental health services, in particular Dual Eligible Special Needs Plans (D-SNPs), a type of Medicare Advantage plan designed around those eligible for both programs.

# Bringing Psychiatrists & Mental Health Professionals Together to Connect, Collaborate & Influence Systems-level change.

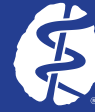

AMERICAN  
PSYCHIATRIC  
ASSOCIATION

## THE MENTAL HEALTH SERVICES CONFERENCE

Oct. 12-14, 2023  
Washington, D.C.

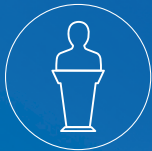

40+  
Sessions

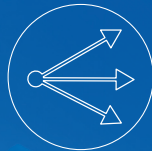

50+  
Topics

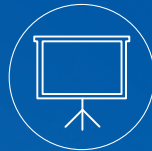

Poster Hall &  
Exhibit Gallery

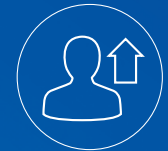

Up to  
17.5 CME\*

The 2023 Mental Health Services Conference will bring psychiatrists and mental health professionals together to collaborate on practical advice to influence systems-level change for their patients. Held in-person in Washington, D.C. at the Capital Hilton Hotel, join us October 12 through 14 as we work together to develop interdisciplinary practical solutions to solve real-world issues.

Not only will you network with psychiatrists looking to encourage change, but the Mental Health Services Conference will be attended by professionals throughout the mental health care field including primary care physicians, nurse practitioners, social workers, and more.

Join us in person to:

- Recognize and improve mental health disparities in the community
- Provide culturally competent care for diverse populations
- Identify barriers to care, including health service delivery issues
- Practical Psychopharmacology and Addictions updates
- Leadership Track
- Training in behavioral management and de-escalation
- Media Training
- And much, much more

Register today at  
[psychiatry.org/MHSC](https://psychiatry.org/MHSC)
