# Psychiatric Services

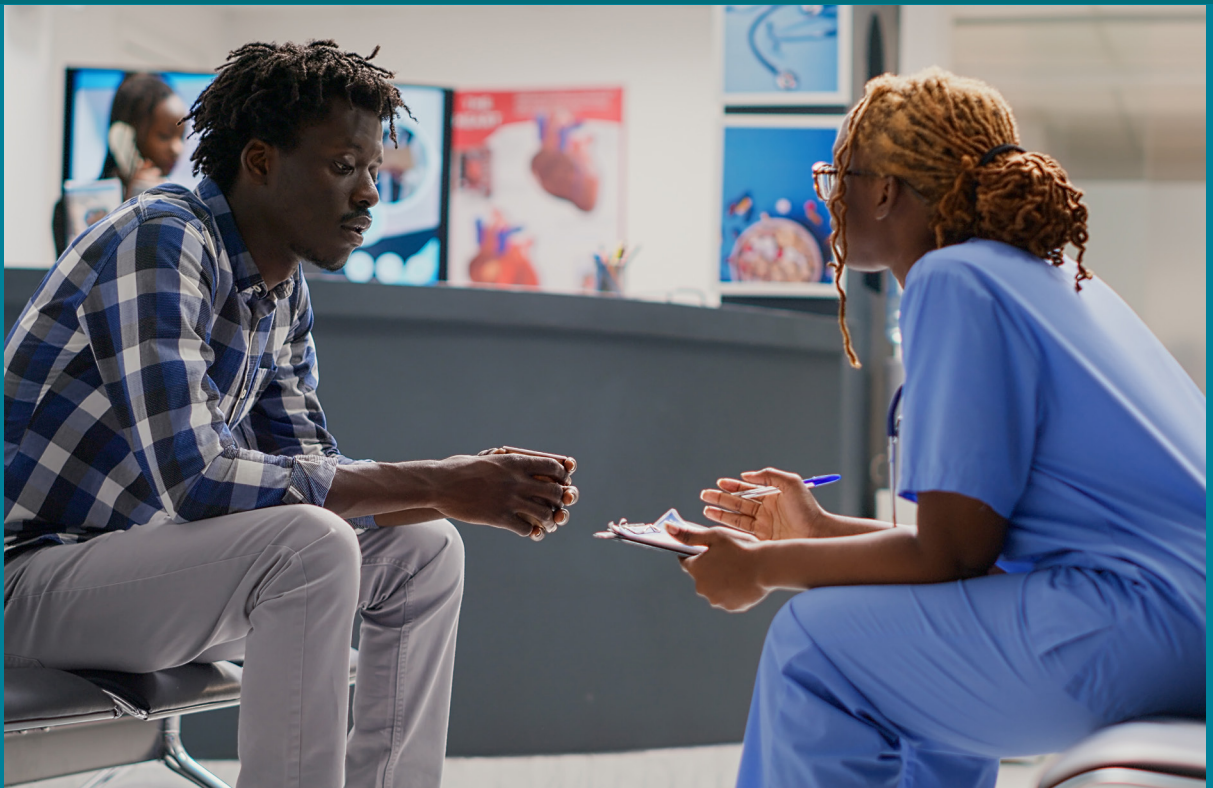

Open Forum: Upending White supremacy in implementation science in community mental health

Personal Account: Career aspirations for people with serious mental disorders

Considerations for endorsing use of emotional support animals

Barriers to meaningful participatory mental health services research and next steps
